# Supplementary material
Source: Royal Society of Chemistry journal article supplement (doi:10.1039/d6fo01039c)
Supplement: d6fo01039c1.pdf [file d6fo01039c1.pdf]

## 1 **Supplementary Materials and Methods**

### 2 **1. Production process flow for yeast protein powder based on *Saccharomyces*** 3 ***cerevisiae* ZAB 02 (CGMCC No. 27288)**

4 The process mainly includes the following core steps: strain activation and  
5 expansion, fermentation culture, cell harvest and disruption, protein extraction and  
6 drying.

7 Step 1: Strain activation and seed expansion. Strain revival: The original strain  
8 ZAB 02 is retrieved from the preservation tube and inoculated under sterile conditions  
9 onto agar plates containing YPD solid medium. It is then incubated at a constant  
10 temperature of 28-30 °C for 48-72 hours to revive the dormant strain. Preparation of  
11 primary seed culture: Single colonies are selected and inoculated into sterile YPD liquid  
12 medium in Erlenmeyer flasks, then cultivated on a shaking incubator at a speed of 150-  
13 200 rpm and 30° C for 18-24 hours to obtain an activated seed culture. Secondary  
14 Expansion: The primary seed culture is transferred to a larger seed tank containing a  
15 greater volume of culture medium at a specific inoculation ratio for scaling up. This  
16 step is aimed at obtaining a sufficient quantity of uniform physiological state cells,  
17 preparing for large-scale fermentation inoculation. Secondary expansion: The primary  
18 seed culture is transferred to a larger seed tank containing a greater volume of culture  
19 medium at a specific inoculation ratio (e.g., 1-5% v/v) for scaling up. This step is aimed  
20 at obtaining a sufficient quantity of uniform physiological state cells, preparing for  
21 large-scale fermentation inoculation.

22 Step 2: Large-scale fermentation culture. Inoculation of fermentation tank: The

23 high-density secondary seed culture is pumped into a sterilized large fermentation tank  
24 according to an optimized inoculation ratio. The fermentation tank is filled with an  
25 optimized medium, typically containing molasses or glucose as the carbon source, and  
26 ammonia, urea, or ammonium sulfate as nitrogen sources, along with necessary  
27 inorganic salts and growth factors. Nutrient feeding: Continuous or batch feeding  
28 techniques are employed to supply concentrated nutrients (primarily carbon sources),  
29 avoiding substrate inhibition and prolonging the exponential growth phase of the cells,  
30 thereby significantly increasing cell density and total protein yield. End of fermentation  
31 assessment: When the residual sugar in the fermentation broth drops to a certain level,  
32 and the cell density no longer shows significant increases, the fermentation is deemed  
33 complete. Typically, the fermentation cycle lasts 15-20 hours.

34 Step 3: Cell harvesting and disruption. Centrifugal separation: Upon completion  
35 of fermentation, high-speed tubular or disk centrifuges are used to separate the yeast  
36 biomass from the culture medium, resulting in wet yeast paste. Washing: The wet yeast  
37 paste is washed with purified water or buffer solution to remove residual culture  
38 medium components and metabolic wastes. Cell Disruption: Yeast cells possess a  
39 robust cell wall that must be disrupted to effectively release the intracellular proteins.

40 Step 4: Protein extraction and product processing. Separation and concentration: The  
41 disrupted slurry undergoes solid-liquid separation (e.g., further centrifugation or  
42 filtration) to remove cell wall debris, resulting in a protein-rich extract. Drying: The  
43 yeast protein extract is dried using a spray dryer, where the liquid material is atomized  
44 into fine droplets and instantly evaporated when in contact with hot air, forming a

45 powder product that is easy to store and transport. Packaging and quality control: The  
 46 dried yeast protein powder is cooled and sieved under sterile conditions for  
 47 standardized packaging. Finally, strict quality inspection of the finished product is  
 48 conducted, including assessments of protein content, moisture, ash content, and  
 49 microbial indicators, to ensure compliance with established standards.

50

51 **Table S1 Yeast protein (SGS Sample ID: QDF23-040327.001) composition table**

| Composition                                      | Content (g/100 g) |
|--------------------------------------------------|-------------------|
| Aspartic acid                                    | 8.62              |
| Threonine                                        | 4.35              |
| Serine                                           | 4.21              |
| Glutamic acid                                    | 10.39             |
| Glucine                                          | 3.53              |
| Alanine                                          | 4.81              |
| Valine                                           | 5.26              |
| Isoleucine                                       | 4.76              |
| Leucine                                          | 7.22              |
| Tyrosine                                         | 3.57              |
| Phenylalanine                                    | 4.34              |
| Lysine                                           | 7.55              |
| Histidine                                        | 1.87              |
| Arginine                                         | 4.93              |
| Proline                                          | 3.21              |
| Tryptophan                                       | 1.06              |
| Cysteine                                         | 0.66              |
| MetSON                                           | 1.54              |
| Total of amino acid                              | 81.88             |
| Total fat                                        | 8.24              |
| Saturated fat                                    | 1.68              |
| Trans fat                                        | 0.08              |
| Total (Fructose+Glucose+Sucrose+Maltose+Lactose) | 0                 |
| Water                                            | 3.6               |
| Ash                                              | 3.3               |
| Nucleic acid                                     | 1.3               |

52

53

54

55

56 **2. Dose conversion from humans to mice based on body surface area (BSA)**

57 Based on recommendations from Zhen-Ao Group Co., Ltd. and the Science and  
 58 Technology Development Center of the China Health Food Association, the suggested  
 59 daily yeast protein intake for adults (average body weight 60 kg) is 6 g/day, equivalent  
 60 to an average daily dietary intake of 100 mg/kg. Mouse body weight was recorded every  
 61 3 days. The daily yeast protein intake for mice was then calculated using the animal  
 62 equivalent dose formula (Table S2). The calculation formula is as follows:

63 Daily yeast protein intake for mice (mg/kg) = [Adult daily yeast protein intake  
 64 (100 mg/kg) × Adult body weight (60 kg) / Adult body surface area value (1.6246 m<sup>2</sup>)]  
 65 × [Mouse body surface area value (0.0076 m<sup>2</sup>) / Mouse body weight (kg)].

66

67 **Table S2 Commonly used data for dose conversion between different animal**  
 68 **species**<sup>1</sup>

| Animal species | Meeh-Rubner K-value | Weight (kg) | Body Surface Area (m <sup>2</sup> ) | Mg/kg-mg/m <sup>2</sup> Transfer Factor | Relative surface area per kilogram of body weight |
|----------------|---------------------|-------------|-------------------------------------|-----------------------------------------|---------------------------------------------------|
| Mice           | 9.1                 | 0.018       | 0.0066                              | 2.9                                     | 1 (0.02kg)                                        |
|                |                     | 0.02        | 0.0067                              | 3                                       |                                                   |
|                |                     | 0.022       | 0.0071                              | 3.1                                     |                                                   |
|                |                     | 0.024       | 0.0076                              | 3.2                                     |                                                   |
| Human          | 10.6                | 40          | 1.2398                              | 32.2                                    | 0.08 (50.0 kg)                                    |
|                |                     | 50          | 1.4386                              | 34.8                                    |                                                   |
|                |                     | 60          | 1.6246                              | 36.9                                    |                                                   |

69

70

**Table S3 Daily oral and gavage doses of yeast protein in mice**

| Day | Yeast protein intake (mg) |       |       |       |       |
|-----|---------------------------|-------|-------|-------|-------|
|     | CO                        | OB    | OM    | GB    | GM    |
| 1   | 0                         | 31.73 | 59.98 | 32.07 | 53.58 |
| 3   | 0                         | 31.01 | 53.03 | 21.84 | 54.76 |
| 5   | 0                         | 31.66 | 54.14 | 23.05 | 55.35 |
| 7   | 0                         | 28.94 | 49.49 | 22.02 | 54.49 |
| 9   | 0                         | 33.15 | 56.69 | 25.61 | 55.32 |
| 11  | 0                         | 34.09 | 58.30 | 27.02 | 55.37 |
| 13  | 0                         | 33.29 | 56.94 | 27.26 | 54.92 |

|    |   |       |       |       |       |
|----|---|-------|-------|-------|-------|
| 15 | 0 | 33.61 | 57.48 | 28.25 | 54.87 |
| 17 | 0 | 33.50 | 57.29 | 28.96 | 55.50 |
| 19 | 0 | 33.18 | 56.74 | 29.53 | 54.80 |
| 21 | 0 | 33.84 | 57.87 | 30.75 | 56.21 |
| 23 | 0 | 33.63 | 57.52 | 31.39 | 56.25 |
| 25 | 0 | 33.67 | 57.58 | 32.97 | 55.66 |
| 27 | 0 | 34.65 | 59.25 | 34.40 | 56.67 |
| 29 | 0 | 33.94 | 63.28 | 33.00 | 57.42 |

71

### 72 **3. Selection criteria for mice sample size and sex**

73 In this study, a sample size of eight mice per group was employed, which is common  
74 and justified in the field of nutritional intervention and aging phenotype research. This  
75 sample size effectively controls for inter-individual variability while providing a  
76 reliable data foundation for subsequent statistical analysis. It also aligns with the "3R  
77 principles" (Replacement, Reduction, and Refinement) of animal research ethics. This  
78 study aims to preliminarily investigate the effects of yeast protein on physiological  
79 functions (particularly the musculoskeletal system) and aging-related biomarkers, as  
80 well as its underlying mechanisms. The estrous cycle in female mice induces periodic  
81 fluctuations in physiological hormone levels, which may directly interfere with various  
82 observed indicators such as bone metabolism, inflammatory status, and gut microbiota.  
83 This could introduce considerable variation, potentially masking the specific effects of  
84 the intervention. In this initial mechanism-exploration stage, the use of a single gender  
85 (male) is a common strategy within the field. This approach aims to minimize the  
86 confounding effects of gender and hormonal cycles, thereby helping to more clearly  
87 reveal the causal relationship between the intervention and the core phenotypes, laying  
88 a foundation for more in-depth follow-up studies <sup>2</sup>.

### 89 **4. DNA extraction and 16S rRNA sequencing**

90 Total microbial genomic DNA was isolated from mouse fecal samples using the  
91 FastPure Stool DNA Isolation Kit (MJYH, Shanghai, China). DNA quality and  
92 concentration were assessed by 1.0% agarose gel electrophoresis and a NanoDrop 2000  
93 spectrophotometer (Thermo Scientific, United States), respectively, and samples were  
94 stored at  $-80^{\circ}\text{C}$  until further analysis. The V3–V4 hypervariable region of the bacterial  
95 16S rRNA gene was amplified with the primer pair 338F (5'-  
96 ACTCCTACGGGAGGCAGCAG-3') and 806R (5'-  
97 GGACTACHVGGGTWTCTAAT-3') using a T100 Thermal Cycler (Bio-Rad, USA).  
98 Each 20  $\mu\text{L}$  PCR reaction contained 4  $\mu\text{L}$  of  $5\times$  Fast Pfu buffer, 2  $\mu\text{L}$  of 2.5 mM dNTPs,  
99 0.8  $\mu\text{L}$  of each primer (5  $\mu\text{M}$ ), 0.4  $\mu\text{L}$  Fast Pfu polymerase, and 10 ng template DNA,  
100 with ddH<sub>2</sub>O added to volume. The PCR protocol comprised an initial denaturation at  
101  $95^{\circ}\text{C}$  for 3 min; 27 cycles of denaturation at  $95^{\circ}\text{C}$  for 30 s, annealing at  $55^{\circ}\text{C}$  for 30 s,  
102 and extension at  $72^{\circ}\text{C}$  for 45 s; a final extension at  $72^{\circ}\text{C}$  for 10 min; and a hold at  $4^{\circ}\text{C}$ .  
103 Amplicons were excised from a 2% agarose gel, purified with the PCR Clean-Up Kit  
104 (YuHua, Shanghai, China) following the manufacturer's instructions, and quantified  
105 using a Qubit 4.0 fluorometer (Thermo Fisher Scientific, USA).

106 Purified amplicons were pooled in equimolar amounts and paired-end sequenced on an  
107 Illumina Nextseq2000 platform (Illumina, San Diego, USA) according to the standard protocols by  
108 Majorbio Bio-Pharm Technology Co. Ltd. (Shanghai, China).

109 After demultiplexing, the raw sequences were subjected to quality filtering using  
110 fastp (v0.19.6) and merged with FLASH (v1.2.11). High-quality sequences were then  
111 processed with the DADA2 plugin within the QIIME 2 pipeline (version 2020.2) using

112 recommended parameters to perform sample-specific error profile modeling and  
113 generate amplicon sequence variants (ASVs) at single-nucleotide resolution. To  
114 mitigate the influence of sequencing depth on diversity analyses, samples were rarefied  
115 to 20,000 sequences per sample, which maintained an average Good' s coverage of  
116 97.90%. Taxonomic classification of ASVs was conducted using a Naïve Bayes  
117 classifier implemented in QIIME 2 against the SILVA 16S rRNA database (release  
118 138). Functional potential of the microbial communities was predicted using PICRUST2  
119 (Phylogenetic Investigation of Communities by Reconstruction of Unobserved States)  
120 based on the ASV representative sequences. The PICRUST2 workflow involved  
121 multiple steps: HMMER was employed for alignment of ASV sequences to reference  
122 databases; EPA-ng and Gappa were used for phylogenetic placement of sequences into  
123 a reference tree; Castor performed 16S gene copy number normalization; and MinPath  
124 generated metabolic pathway predictions from inferred gene families. The entire  
125 process followed the standard PICRUST2 protocol.

126 Bioinformatic analysis of the gut microbiota was performed on the Majorbio  
127 Cloud Platform (<https://cloud.majorbio.com>). Based on the amplicon sequence variants  
128 (ASVs), rarefaction curves were generated and alpha diversity indices—including  
129 observed ASVs, Chao1 richness, Shannon index, and Good's coverage—were  
130 calculated using Mothur (v1.30.1). Beta diversity was assessed by principal coordinate  
131 analysis (PCoA) based on Bray–Curtis dissimilarity with the Vegan package (v2.5-3)  
132 in R. To identify differentially abundant bacterial taxa across phylogenetic levels (from  
133 phylum to genus), community bar plots and Circos plots were employed. Ternary

134 diagrams were used to visualize the composition and distribution of dominant species  
135 among three sample groupings. Species exhibiting strong associations in Spearman  
136 correlation analysis were further selected for microbial co-occurrence network  
137 construction. Finally, ordinal regression analysis was applied to evaluate the  
138 relationships between individual clinical factors and microbial community structure,  
139 quantifying the contribution of each clinical variable to inter-sample compositional  
140 variation.

141

142

143

144

145

146

147

148

149

150

151

152

153

154

155

156

157

158

159

160

161

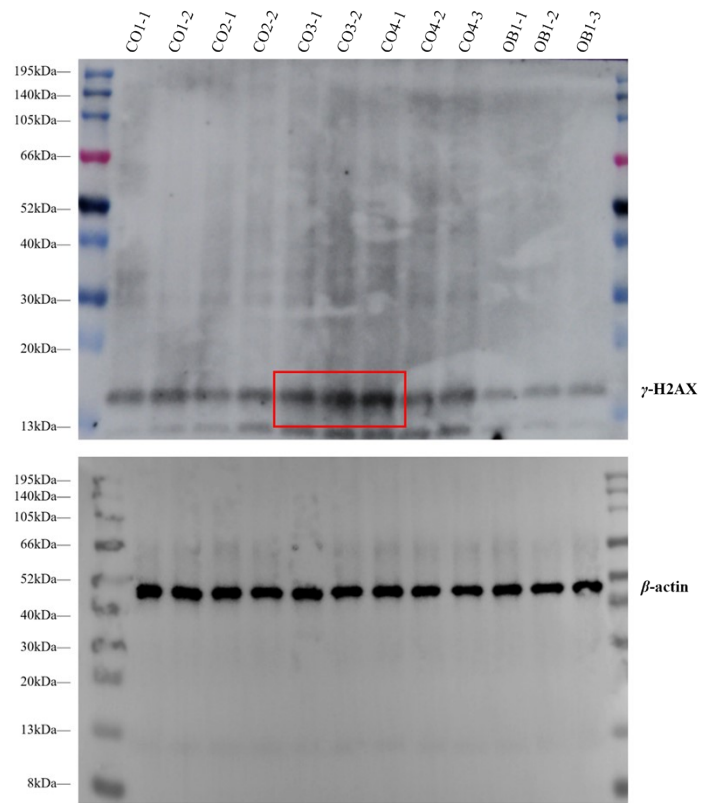

162

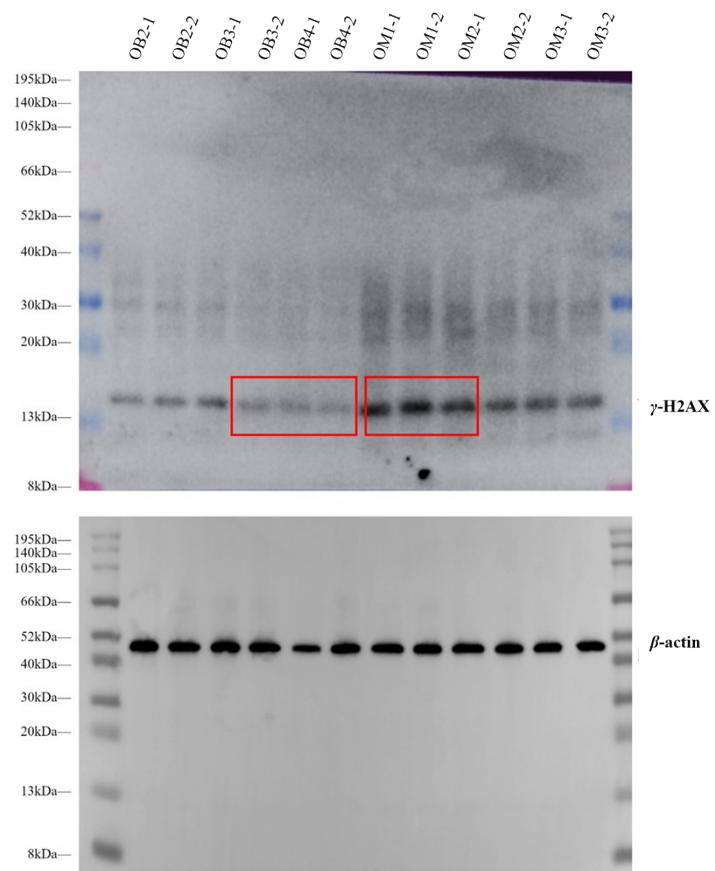

163

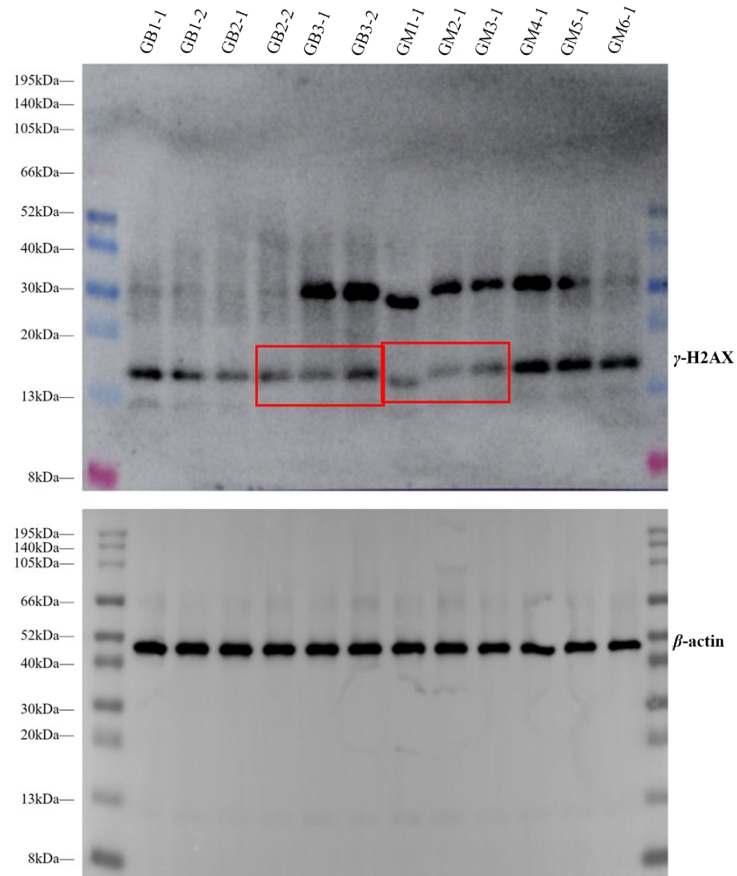

164

165 **Figure S1. Western blot image showing  $\gamma$ -H2AX expression in the liver. The red box in the**  
 166 **figure indicates the WB strip in Figure 4.**

167

168

169

170

171

172

173

174

175

176

177

178

179

180

181

182

183

184

185

186

187 Reference

188 [1] Reagan-Shaw S, Nihal M, Ahmad N. Dose translation from animal to human studies  
189 revisited. *Faseb j*, 2008, 22(3), 659-661. DOI: 10.1096/fj.07-9574LSF.

190 [2] Best L, Dost T, Esser D, Flor S, et al. Metabolic modelling reveals the aging-  
191 associated decline of host-microbiome metabolic interactions in mice. *Nat Microbiol.*  
192 2025 Apr;10(4):973-991. DOI: 10.1038/s41564-025-01959-z.F.

193
